# Supplementary material
Source: PubMed Central journal article supplement (PMC3579311)

## Supporting Information

### Chemoenzymatic Asymmetric Synthesis of Pregabalin-Precursors via Asymmetric Bioreduction of $\beta$ -Cyano-Acrylate Esters Using Ene-Reductases

Christoph K. Winkler,<sup>a</sup> Dorina Clay,<sup>a</sup> Simon Davies,<sup>b</sup> Pat O'Neill,<sup>b</sup> Paul McDaid,<sup>b</sup> Sebastien Debarge,<sup>b</sup> Jeremy Steflík,<sup>c</sup> Mike Karmilowicz,<sup>c</sup> John W. Wong,<sup>c,\*</sup> Kurt Faber<sup>a,\*</sup>

<sup>a</sup> Department of Chemistry, Organic & Bioorganic Chemistry, University of Graz, Heinrichstrasse 28, A-8010 Graz, Austria; <sup>b</sup> Pfizer Global Process Development Centre, Loughbeg, Co. Cork, Ireland; <sup>c</sup> Pfizer Chemical R&D, Eastern Point Road, Groton, CT 06340, USA.

#### Table of contents:

|                                                                                                      |   |
|------------------------------------------------------------------------------------------------------|---|
| <b>Cloning, his-tagging, cultivation and purification of EBP1 from <i>Candida albicans</i></b> ..... | 2 |
| <b>Analytical methods:</b> .....                                                                     | 6 |
| <b>NMR:</b> .....                                                                                    | 7 |

---

\* Corresponding author information: <John.W.Wong@Pfizer.com>, phone +1-860-441-6882;  
<Kurt.Faber@Uni-Graz.at>, phone +43-316-380-5332.

**Cloning, his-tagging, cultivation and purification of EBP1 from *Candida albicans***

**AA-Sequence:**

MTIESTNSFVVPSTDKLIDVTPLGSTKLFQPIKVGNNVLPQRIAYVPTTRFRASKDHIPS  
 DLQLNYYNARSQYPGTLIITEATFASERGGIDLHVPGIYNDAQAKSWKKINEAIHGNG  
 SFSSVQLWYLGRVANAKDLKDSGLPLIAPSAVYWDENSEKLAKEAGNELRALTEEEI  
 DHIVEVEYPNAAKHALEAGFDYVEIHGAHGYLLDQFLNLASNKRTDKYGCGSIENRA  
 RLLLRVVDKLIIEVVGANRLALRLSPWASFQGMIEGEEIHSYILQQLQQRADNGQQL  
 AYISLVEPRVTGIYDVSLKDQQGRSNEFAYKIWKGNFIRAGNYTYDAPEFKTLINDLK  
 NDRSIIIGFSRFFTSNPDLVEKLLKLGKPLNYYNREEFYKYNYGYNSYDESEKQVIGKP  
 LA

**EBP1 DNA-Sequence**

>gi|68483570:c70174-68951 *Candida albicans* SC5314 chromosome 6 Ctg19-10035, whole genome shotgun sequence:

ATGACTATTGAATCAACTAATTCATTTGTTGTCCCATCAGATACTGAATTAATTGA  
 TGTTACTCCATTAGGTTCAACAAAATTATTTCAACCAATTAAGTCGGTAACAAT  
 GTTTTACCTCAACGTATTGCTTATGTCCCAACCACCAGATTTAGAGCTTCTAAAGA  
 TCATATTCCAAGTGATTTACAATTAATTATTATAATGCTCGTTCTCAATATCCAG  
 GTACATTGATTATTACTGAAGCAACATTTGCATCTGAAAGAGGTGGTATTGATTT  
 ACATGTTCCAGGTATTTATAATGACGTTCAAGCTAAAAGTTGGAAGAAAATCAAT  
 GAAGCAATTCATGGCAATGGAAGTTTCAGTTCAGTTCAATTATGGTATTTAGGTA  
 GAGTTGCTAATGCTAAAGATTTGAAAGATGCTGGATTACCTCTTATTGCGCCATC  
 AGCAGTTTATTGGGATGAGAATAGTGAAAAATTGGCCAAAGAAGCTGGAAATGA  
 ATTGAGAGCATTAACTGAAGAAGAAATTGATCATATTGTTGAAGTTGAATATCCT  
 AATGCTGCTAAACATGCACTTGAAGCAGGATTTGATTATGTTGAAATCCATGGTG  
 CTCATGGTTACTTGTGGATCAGTTTTTAAATCTTGCCTCTAATAAAAAGAACCGAT

AAATATGGTTGTGGTAGTATTGAAAATCGTGCACGATTATTATTAAGAGTGGTTG  
ATAAATTAATTGAAGTTGTTGGTGCTAATAGATTGGCATTACGTTTATCACCATGG  
GCTAGTTTCCAAGGTATGGAAATTGAAGGTGAAGAAATCCATTCATATATTTTAC  
AACAATTACAACAACGTGCTGATAATGGTCAACAATTGGCTTATATTTCTCTTGTT  
GAACCTCGTGTTACTGGTATTTATGATGTTTCTTTAAAAGATCAACAAGGTCGTAG  
TAATGAATTTGCTTATAAGATTTGGAAAGGAACTTTGTTTCGTGCTGGTAATTATA  
CTTATGATGCTCCAGAATTTAAAACCTTTGATTAATGATTTAAAGAATGATCGTACT  
ATTATTGGATTTTCTAGATTTTCACTTCAAATCCTGATTTAGTGGAAAAATTGAA  
ATTGGGTAAACCATTGAATTATTATAATCGTGAAGAATTTTATAAGTACTACAAC  
TATGGTTATAATTCTTATGATGAATCAGAAAAGCAAGTCATTGGTAAACCATTGG  
CATAG

### **Cloning and His-tagging**

The design of the primers for adding a HIS-tag on the C-terminus of EBP1 using a pET22-b(+) vector was done using OligoCalc ([www.basic.northwestern.edu/biotools/oligocalc.html](http://www.basic.northwestern.edu/biotools/oligocalc.html)). As template DNA for the PCR a plasmid preparation of EBP1 was done using the kit of Qiagen. For the PCR 5 x Phusion HF buffer (10  $\mu$ L), dNTPs (1  $\mu$ L, 10 mM), forward primer (2.5  $\mu$ L, 10  $\mu$ mol) and reverse primer (2.5  $\mu$ mol), Phusion DNA Polymerase (Hot Start, 0.5  $\mu$ L), template DNA (1 pg – 10 ng plasmid DNA; 1  $\mu$ L) and H<sub>2</sub>O (32.5  $\mu$ L) were used. The PCR program started with initial denaturation for 30 sec at 98 °C followed by 35 cycles of denaturation at 98 °C for 10 sec, annealing at 60.9 °C for 25 sec and extension at 72 °C for 20 sec. The program ended with the final elongation at 72 °C for 7 min and 4 °C hold. The PCR product was purified via agarose gel before the restriction with NdeI and XhoI for 1.5 hours at 37 °C. For the restriction PCR product (0.4  $\mu$ g, 20  $\mu$ L), XhoI (Fermentas Fast Digest; 2  $\mu$ L), NdeI (Fermentas Fast Digest; 2  $\mu$ L), 10 x Fermentas Fast Digest Green Buffer (4  $\mu$ L) and H<sub>2</sub>O (32  $\mu$ L) were used. For the restriction pET22-b(+) vector (2.86  $\mu$ g, 40  $\mu$ L), XhoI (4  $\mu$ L),

NdeI (2  $\mu$ L), 10 x 0 buffer (6  $\mu$ L) and H<sub>2</sub>O (8  $\mu$ L) were used for 3 hours at 37 °C. The size of the vector was 5500 base pairs and the size of the plasmid-insert 1100 base pairs. After purification of the restriction the ligation of the insert into the vector was performed using the insert (36.4 ng/ $\mu$ L; 1.7  $\mu$ L), 10 x ligation buffer (2  $\mu$ L), vector (38.7 ng/ $\mu$ L; 2.6  $\mu$ L), H<sub>2</sub>O (12.7  $\mu$ L) and ligase (1  $\mu$ L). After 1 hour of ligation at 22 °C the inactivation followed at 65 °C for 10 min. Then the ligated vector was re-cooled on ice. The transformation was done into 50  $\mu$ L Rosetta<sup>TM</sup> 2 (DE3) pLysS competent cells (Novagen) using 5  $\mu$ L of ligation product. The mixture was kept on ice for 30 min before heat-shocking for 30 sec on 42 °C and re-cooling on ice for 2 min afterwards. Then 250  $\mu$ L SOC-media were added and incubated at 37 °C, 300 rpm for 1 hour. Colonies were cultivated on agar-plates containing ampicillin and chloramphenicol overnight at 37 °C. Forward NdeI: GCC GCA GGC cat atg ACT ATT GAA TCA ACT AAT TCA TTT GTT GTC; melting point: 56.79 °C; reverse XhoI: GTG GTG ctc gag TGC CAA TGG TTT ACC AAT GAC TTG C; melting point: 56.66 °C

### **Cultivation and Purification**

The overnight culture was cultivated for 14-16 hours in LB-Media at 37 °C and 120 rpm. ampicillin (100 mg/L) and chloramphenicol (20 mg/L) were added. The inoculation was done using glycerol stock solution of EBP1 (20  $\mu$ L). The main culture of EBP1 was done in an auto-induction media. For the media (total 670 mL) separately autoclaved solutions of 8 x ZY (276 mL), 50 x Lac (13.4 mL), NPSC (33.5 mL), trace element mix (1-3 mL), MgSO<sub>4</sub> (1 M, 1.34 mL), H<sub>2</sub>O (306 mL) and sodium succinate (33.5 mL, 0.5 M), were combined. The cultivation was at 20 °C and 120 rpm for 3 days in a 2L shaking-flask containing 500 mL of media. For inoculation of 500 mL media 15 mL of ONC were used. After 3 days the cells were collected by centrifuging at 8000 rpm and 4 °C for 20 min. The wet cells were frozen at -20 °C for at least one night. For purification, thawed cells (15 g) were suspended in lysis-buffer (10 mM imidazole, 50 mM NaH<sub>2</sub>PO<sub>4</sub>, 300 mM NaCl, 25 mL) adding traces of FMN.

The cell disruption was done by ultrasonication using 35 % amplitude for 5 min (1 sec on, 3 sec off) while cooling with ice-water. Afterwards cells were centrifuged twice for 20 min at 4 °C and 1800 rpm. The clear supernatant was used for Ni-affinity chromatography purification using a 5 mL His trap HP column from GE Healthcare. The column first was equilibrated with lysis-buffer before applying the cell-free extract (flow: 1 mL/min). Then the column was washed with wash-buffer (20 mM imidazole, 50 mM NaH<sub>2</sub>PO<sub>4</sub>, 300 mM NaCl) until the eluting buffer stayed clear. Then the protein was eluted (1 mL per fraction) using elution-buffer (150 mM imidazole, 50 mM NaH<sub>2</sub>PO<sub>4</sub>, 300 mM NaCl). All active fractions were combined and dialysed overnight in (50 mM Tris-HCl buffer pH 7.5) before concentration and storage at -20 °C.

**Buffers and Solutions:**

ZY: 40 g/L yeast extract, 80 g/L trypton; NPSC: 1 M NH<sub>4</sub>Cl, 0.1 M Na<sub>2</sub>SO<sub>4</sub>, 0.5 M KH<sub>2</sub>PO<sub>4</sub>, 0.5 M Na<sub>2</sub>HPO<sub>4</sub>; 50 x Lac: 25 % glycerol, 2.5 % glucose, 10 % lactose; succinate: 0.5 M disodium succinate; trace elements: 50 mM FeCl<sub>3</sub>, 20 mM CaCl<sub>2</sub>, 10 mM MnCl<sub>2</sub>, 10 mM ZnSO<sub>4</sub>, 2 mM CoCl<sub>2</sub>, 2 mM CuCl<sub>2</sub>, 2 mM Na<sub>2</sub>MoO<sub>4</sub>, 2 mM H<sub>3</sub>BO<sub>3</sub>, 2mM Na<sub>2</sub>SeO<sub>3</sub>, 2 mM NiCl<sub>2</sub>, diluted with 60 mM HCl conc. to 1:20.

**Analytical methods:**

Chiral and achiral GC analyses were carried out using a Hydrodex- $\beta$ -TBDAc capillary column (250 m x 0.25 mm id).

**Table S1.** GC-Retention times for substrates **1a-7a** and products (*R*)- and (*S*)-**1b-7b**.

| Compound | Method | ( <i>E</i> )-Isomer | ( <i>Z</i> )-Isomer | ( <i>R</i> )-Product | ( <i>S</i> )-Product |
|----------|--------|---------------------|---------------------|----------------------|----------------------|
| <b>1</b> | A      | 3.71                | 5.78                | 6.37                 | 5.59                 |
| <b>2</b> | A      | 4.00                | 6.59                | 6.22                 | 5.88                 |
| <b>3</b> | B      | 30.13               | 52.87               | 41.49                | 41.27                |
| <b>4</b> | C      | 5.09                | 9.58                | 8.36                 | 8.58                 |
| <b>5</b> | C      | 3.96                | 7.69                | 6.82                 | 6.99                 |
| <b>6</b> | B      | -                   | 41.03               | 39.59                | 38.88                |
| <b>7</b> | C      | 7.32                | -                   | 11.73                | 11.85                |

Methods: A: 140 °C hold 10 min, 10 °C min<sup>-1</sup> to 180 °C; B: 80 °C, 1 °C min<sup>-1</sup> to 120 °C, 10 °C min<sup>-1</sup> to 180 °C; C: 140 °C hold 10 min, 10 °C min<sup>-1</sup> to 160 °C, hold 10 min.

## NMR:

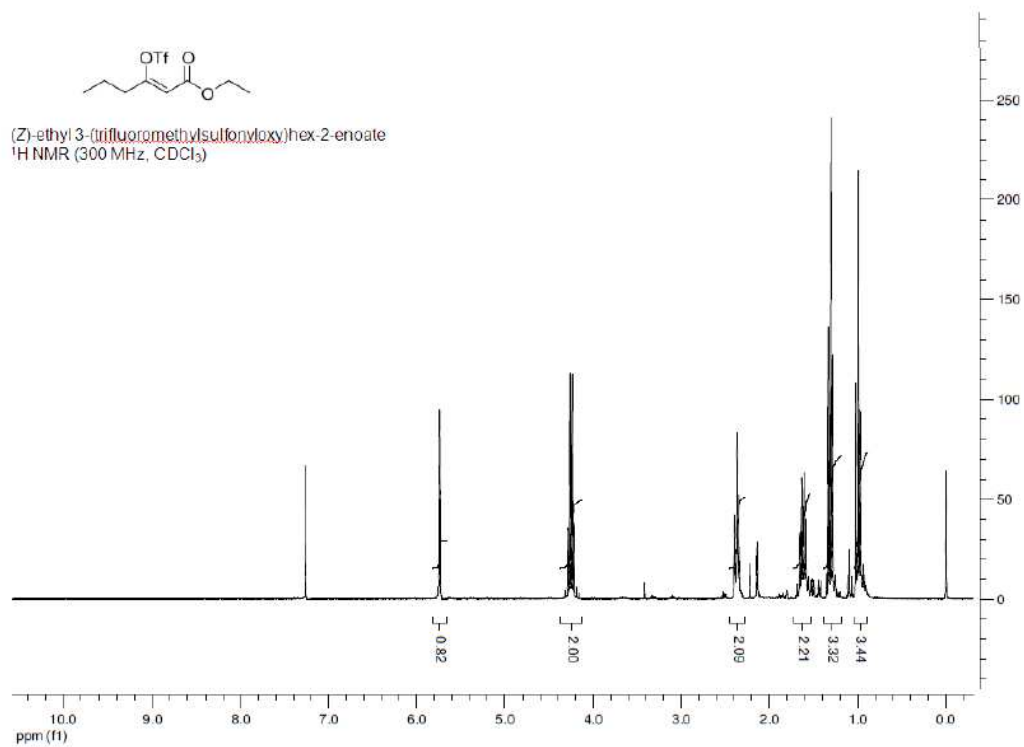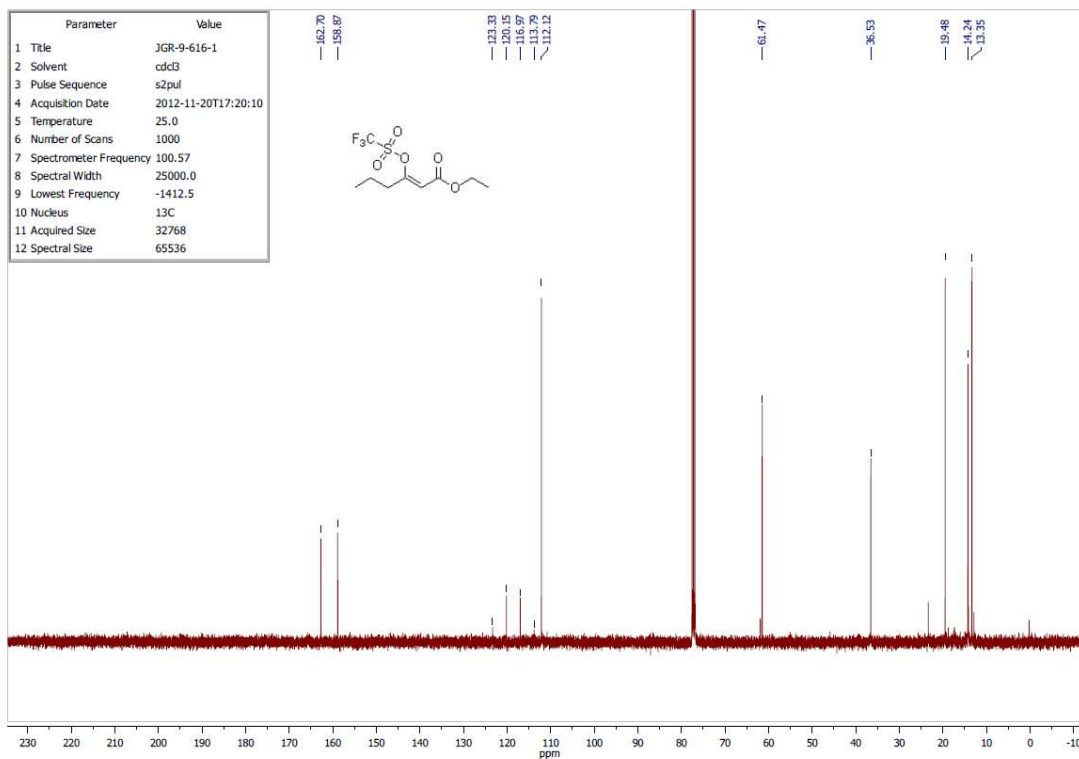

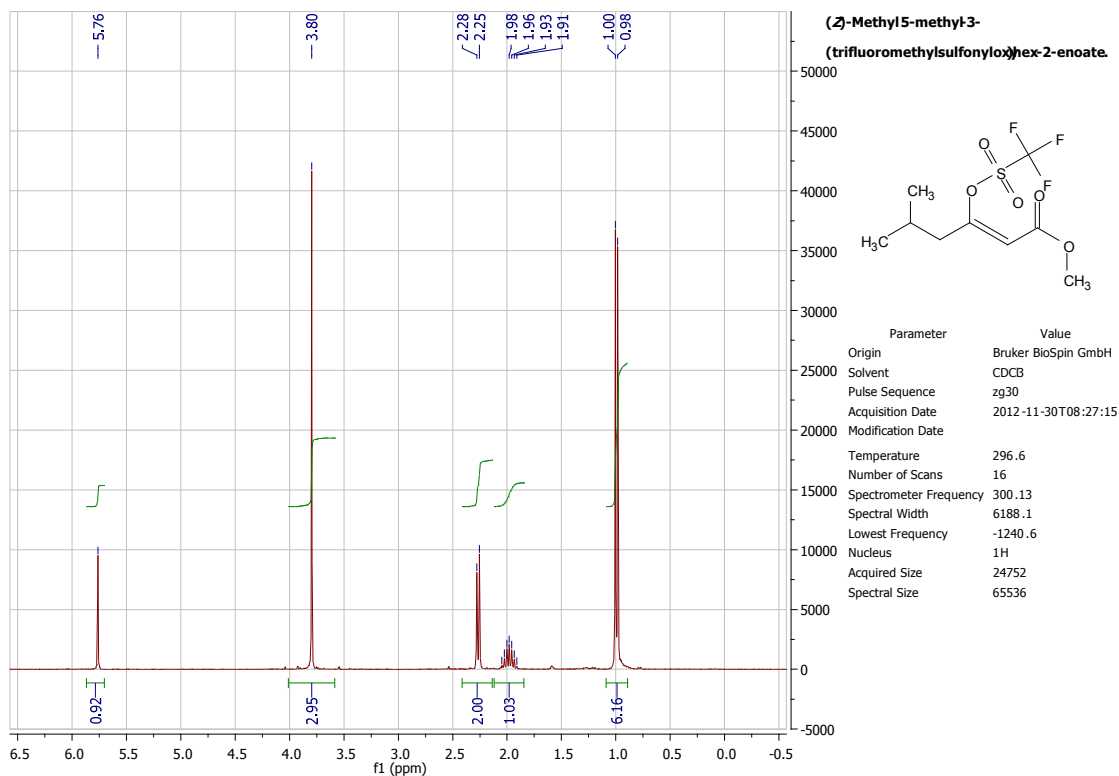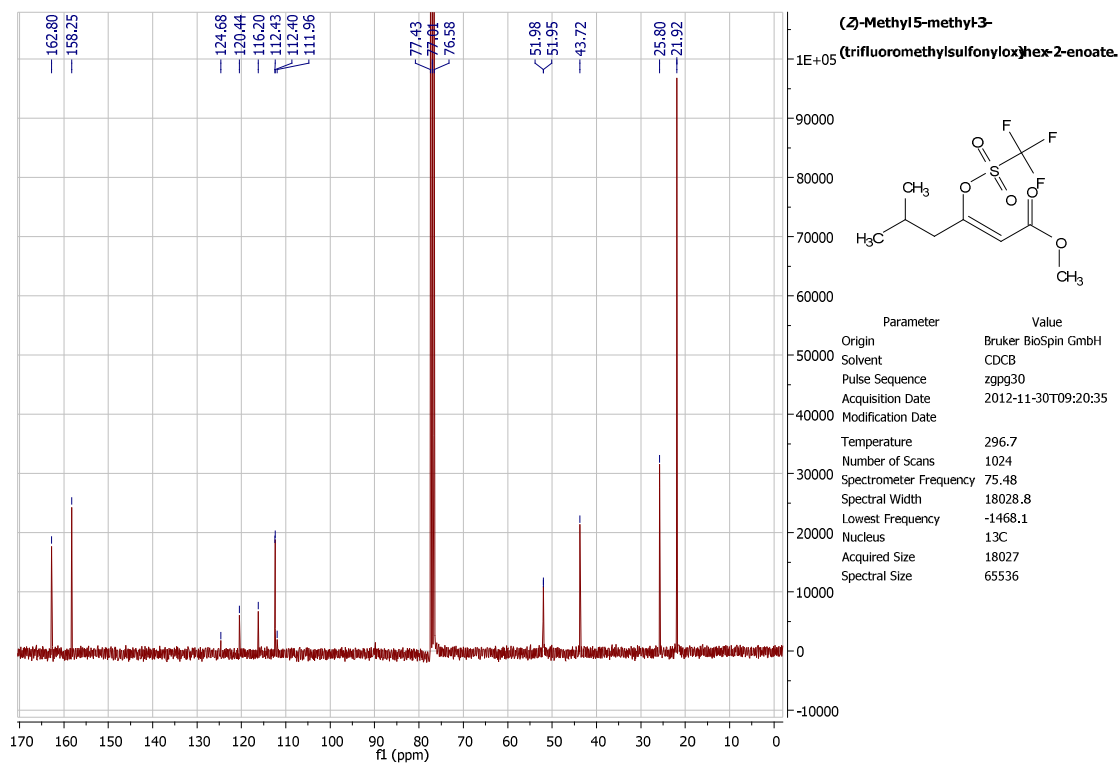



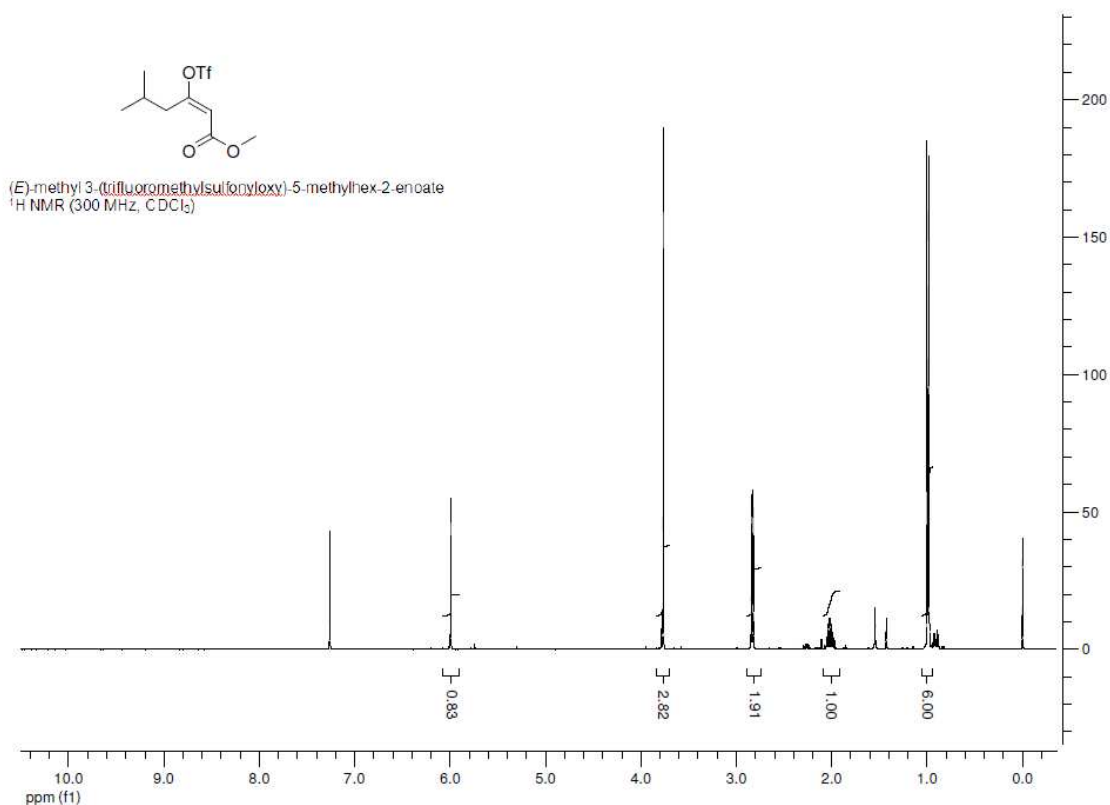

**(E)-Methyl (trifluoromethylsulfonyloxy)-5-methylhex-2-enoate**

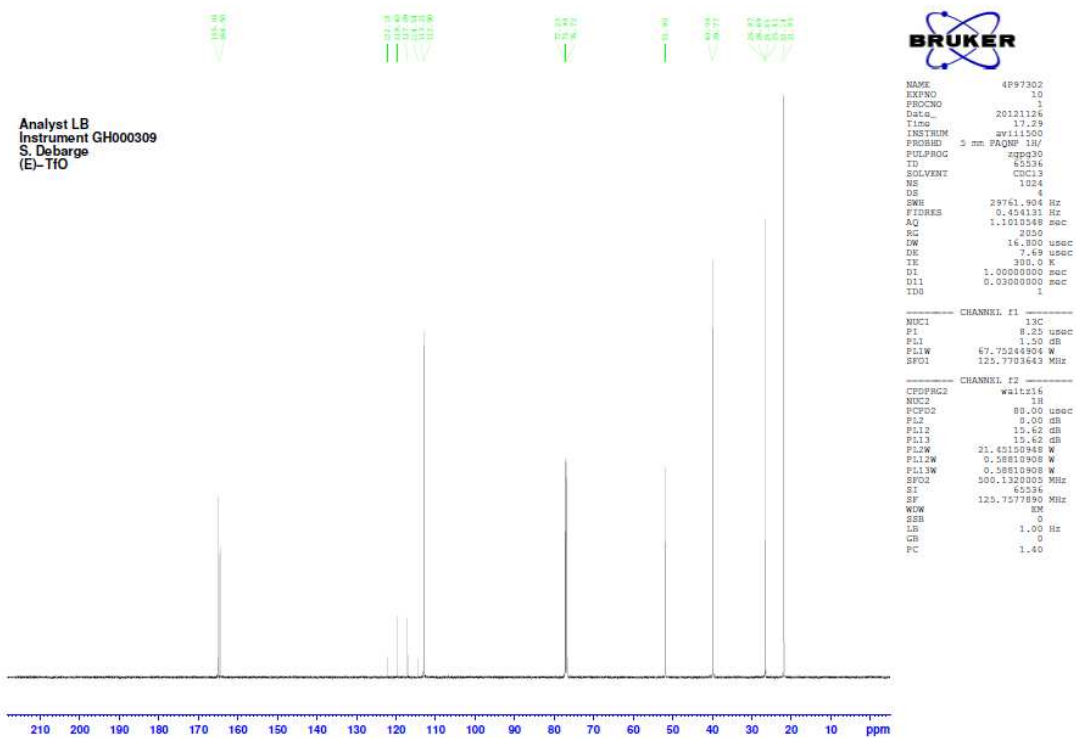

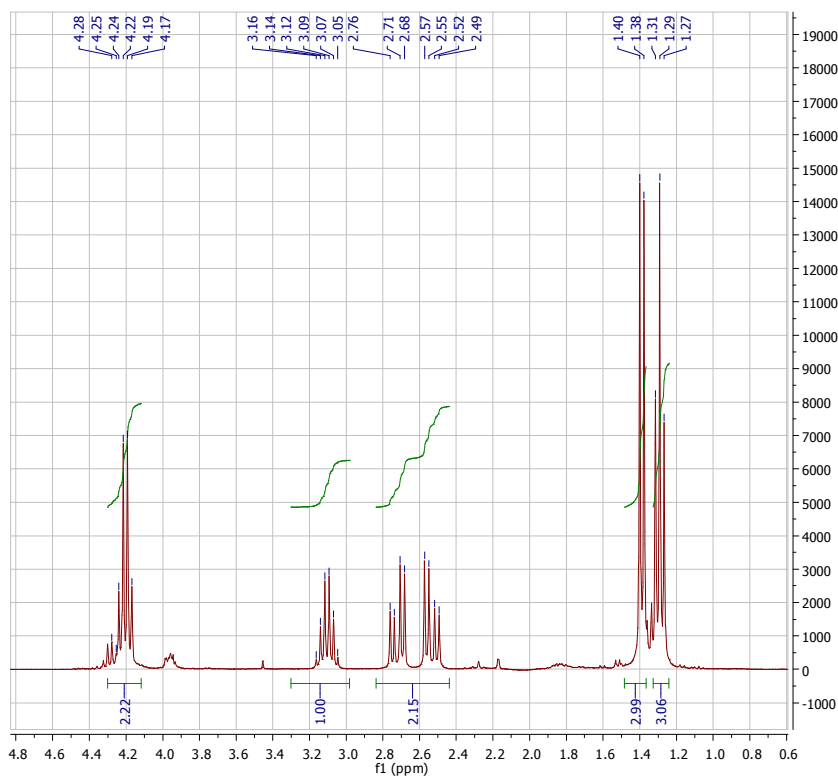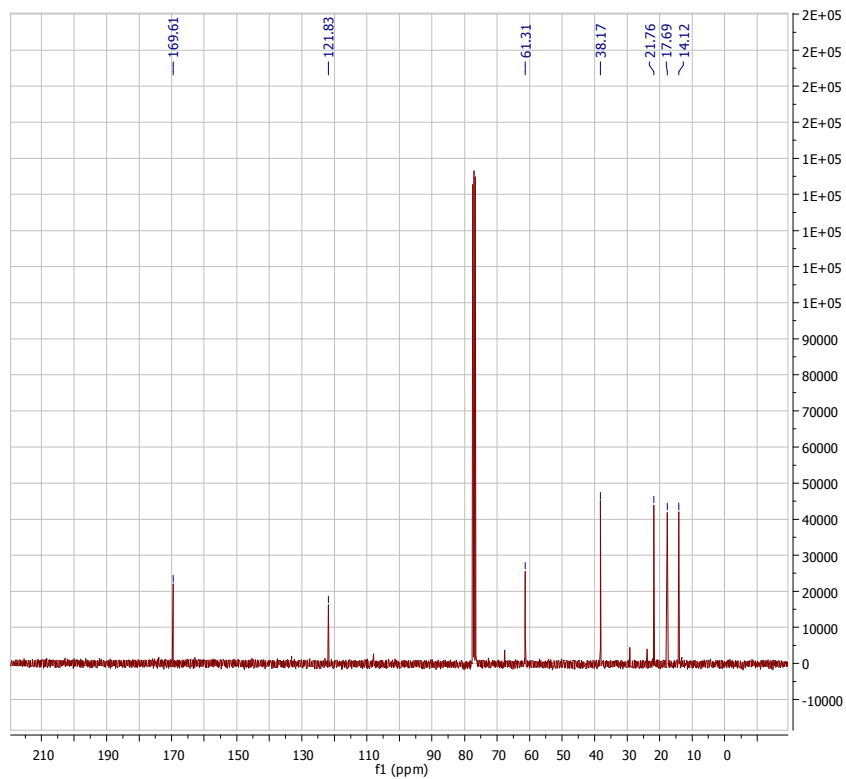

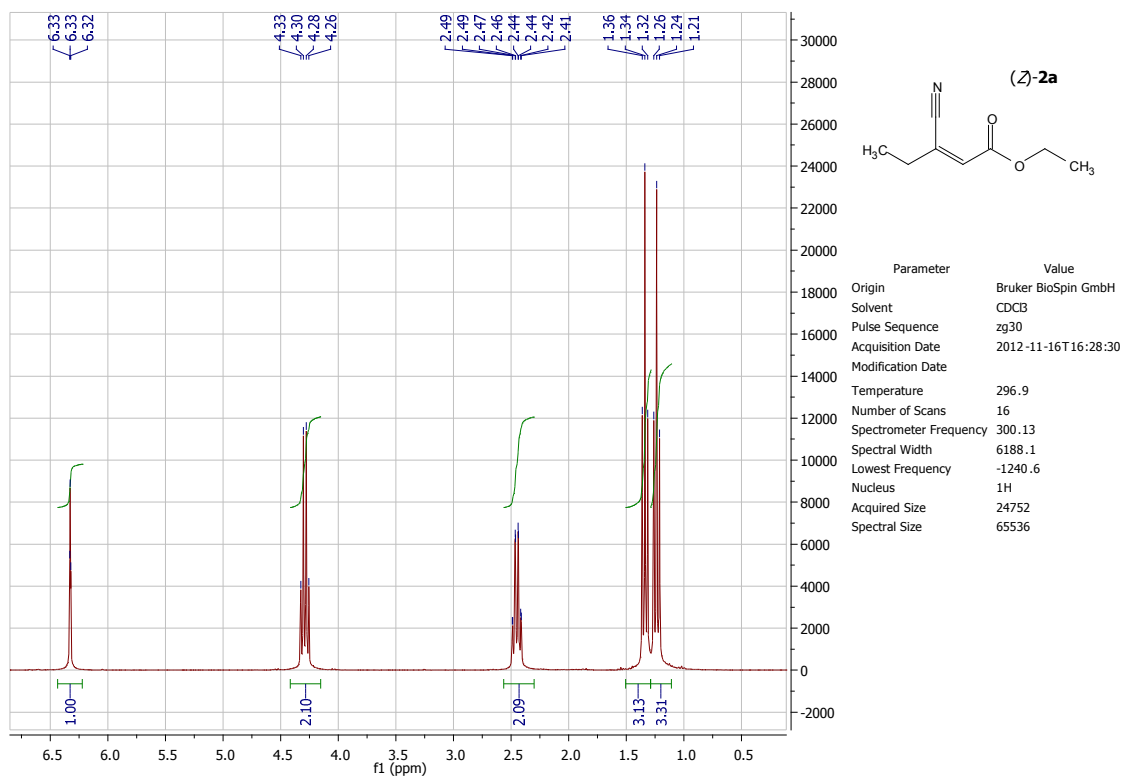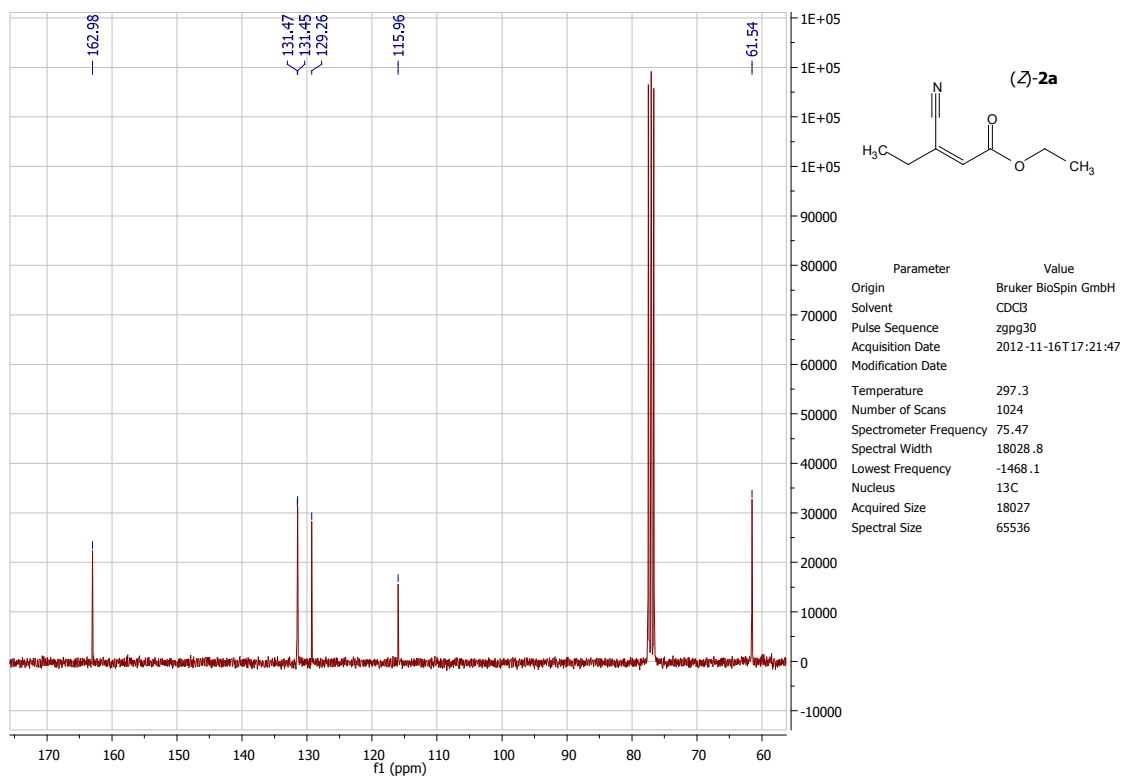

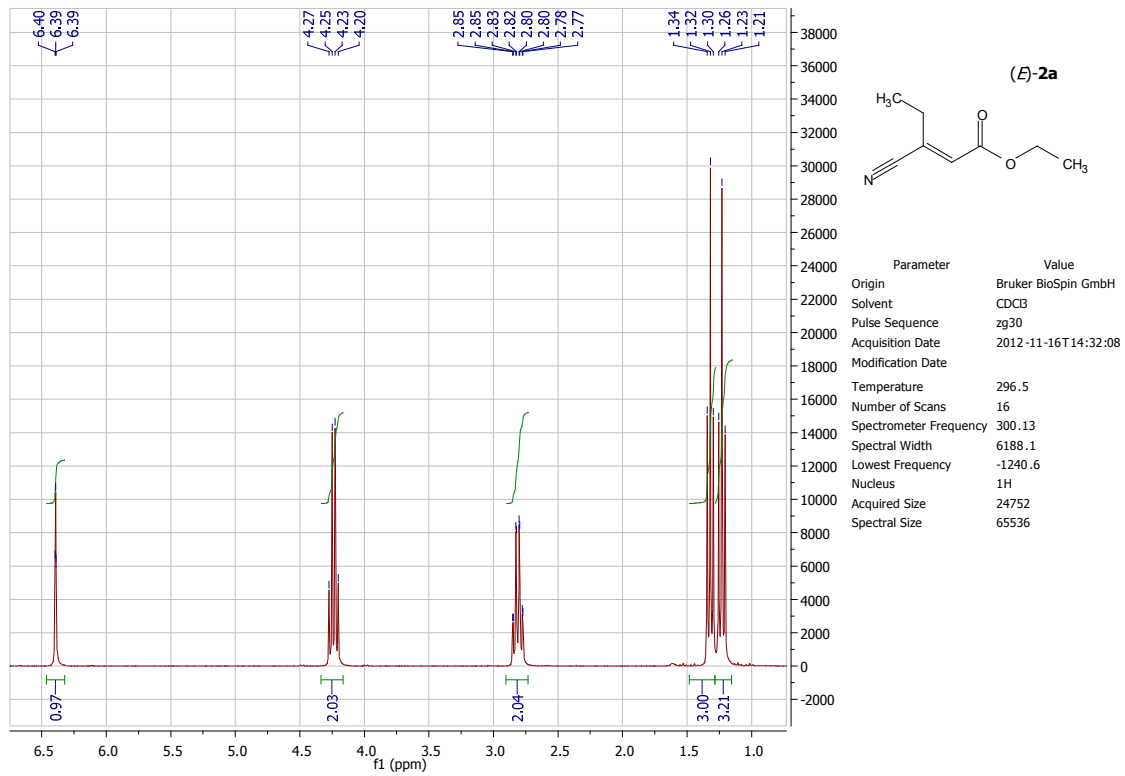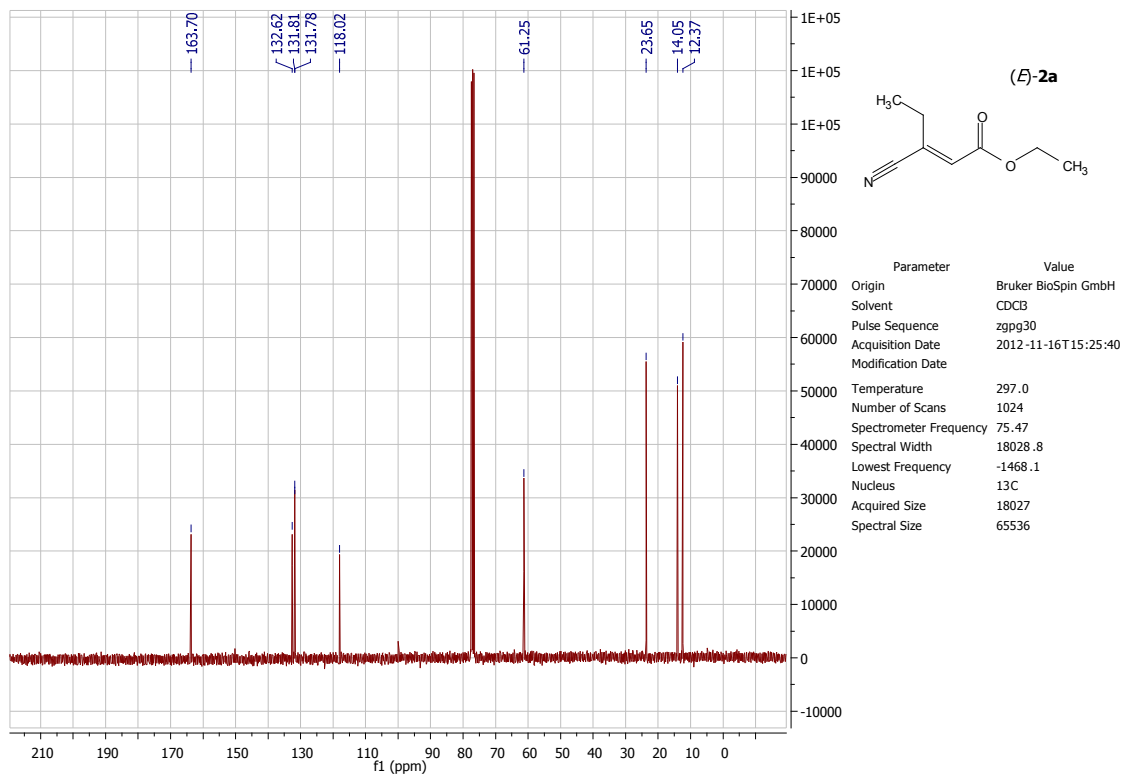

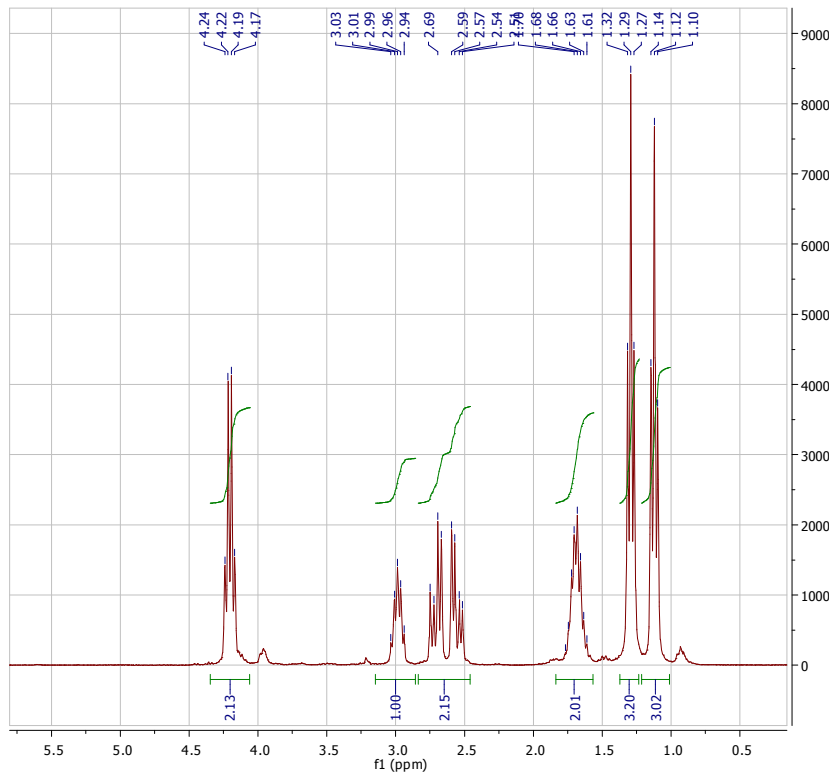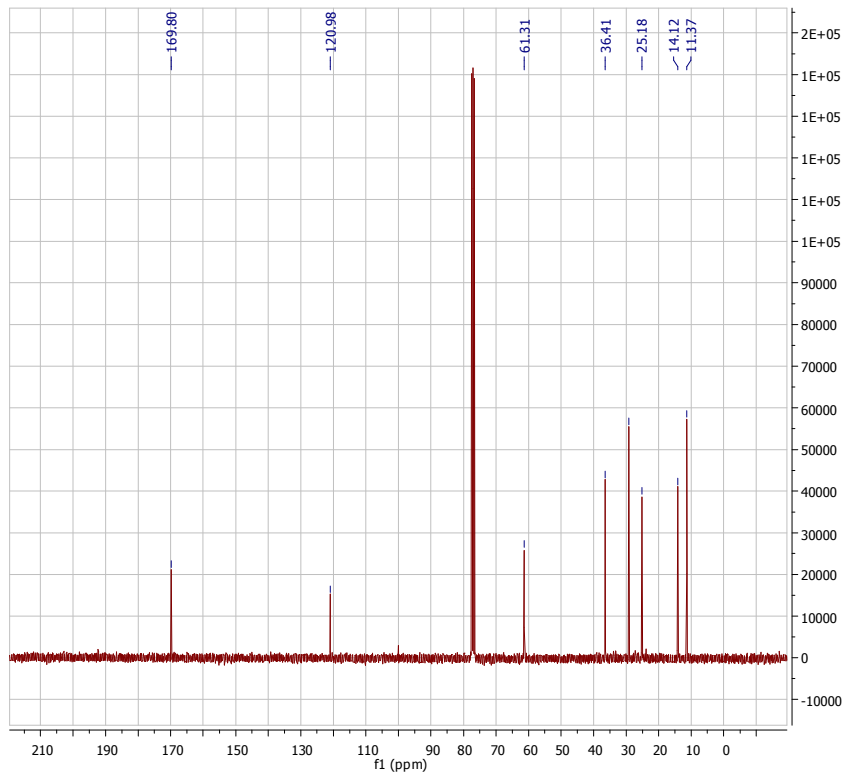

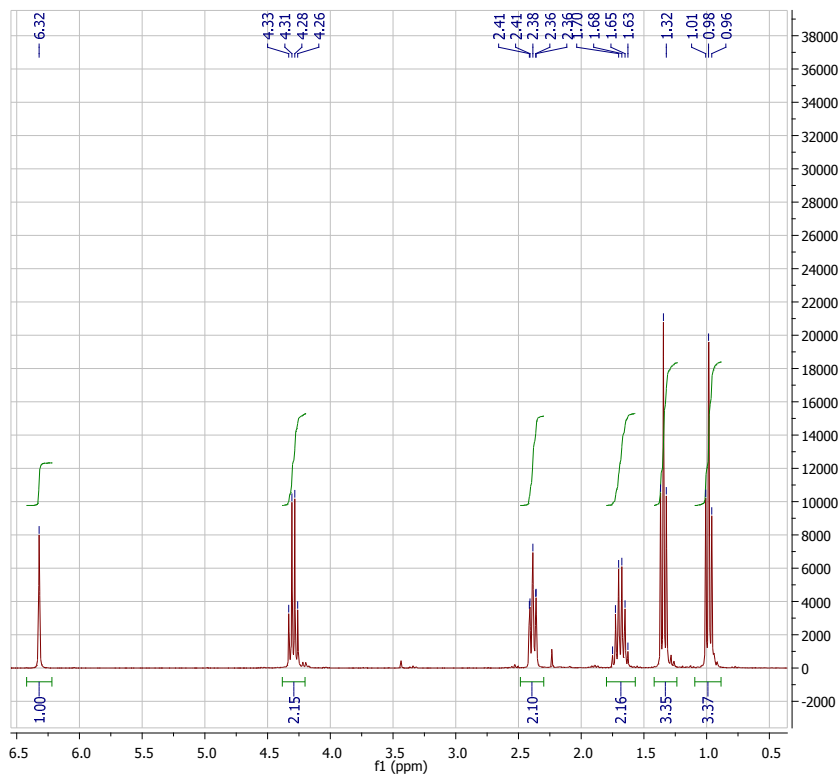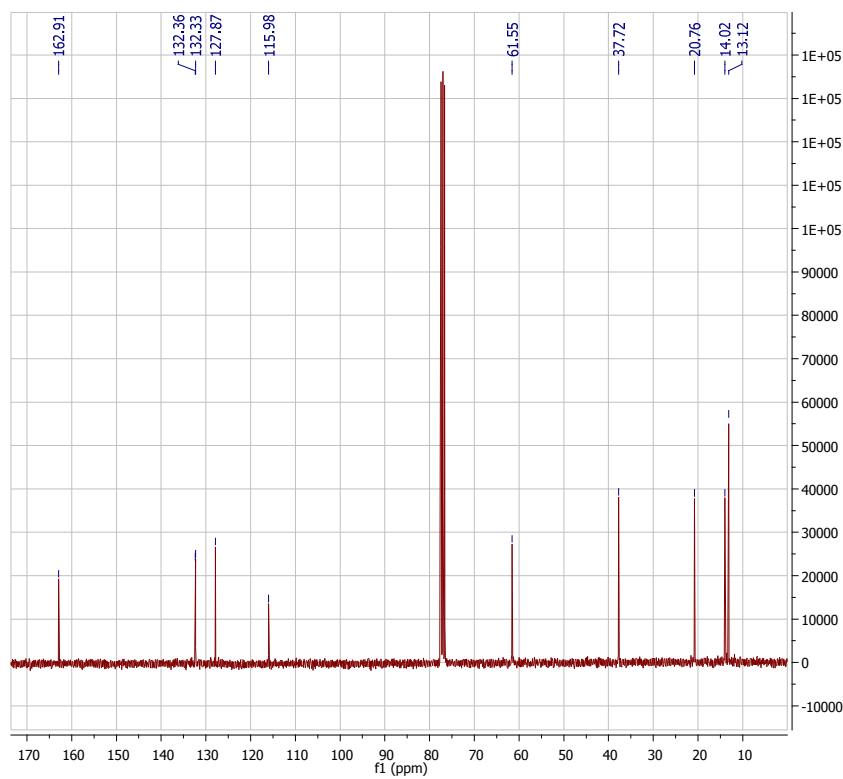

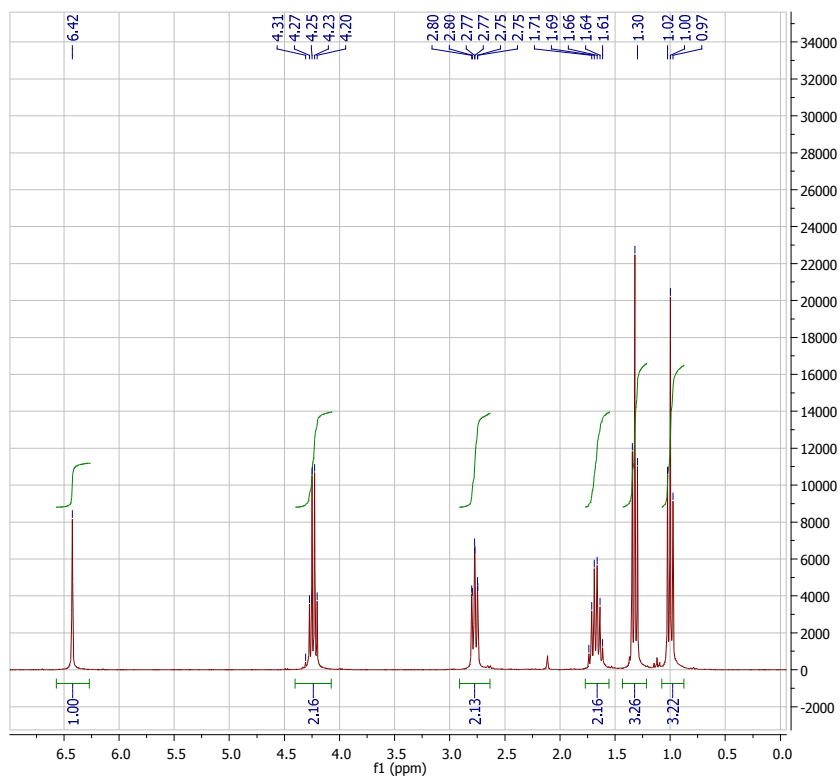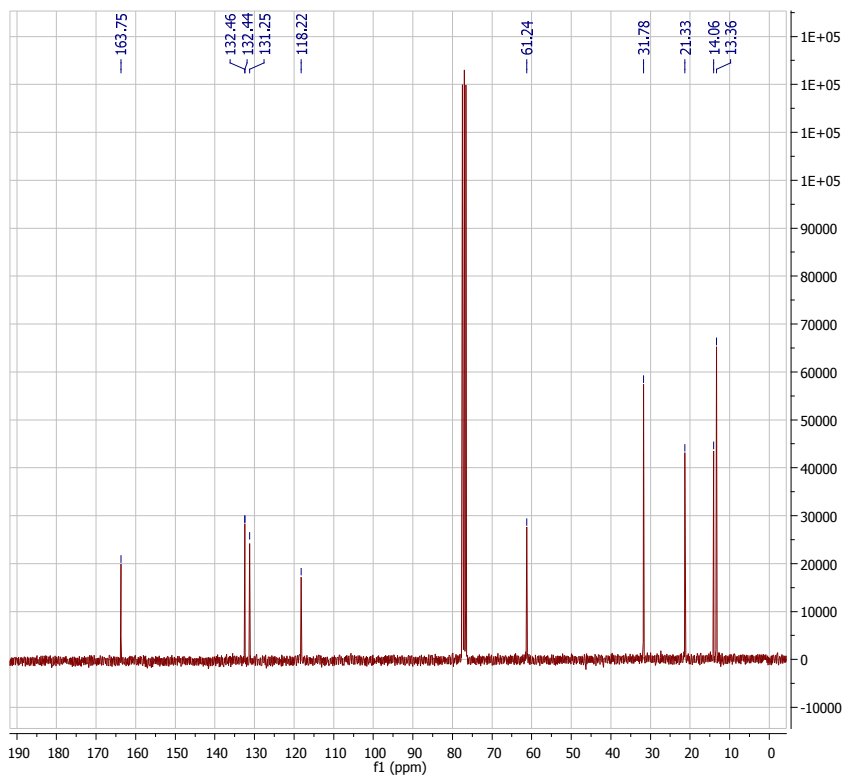

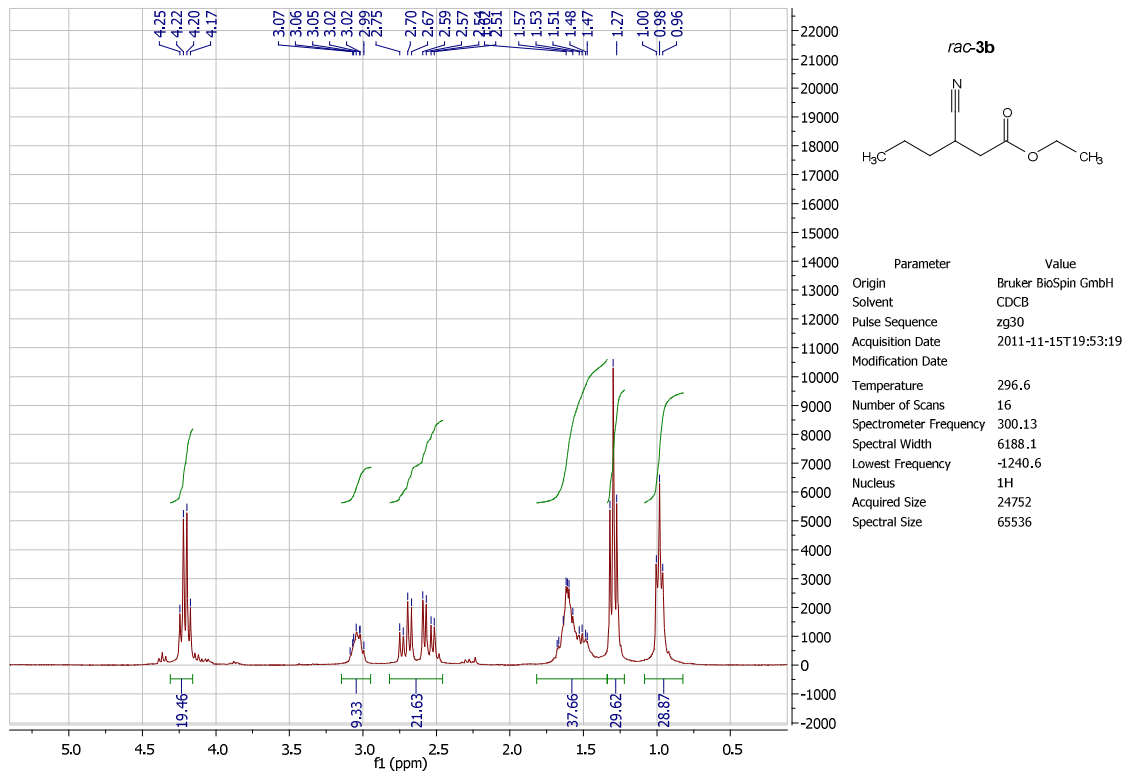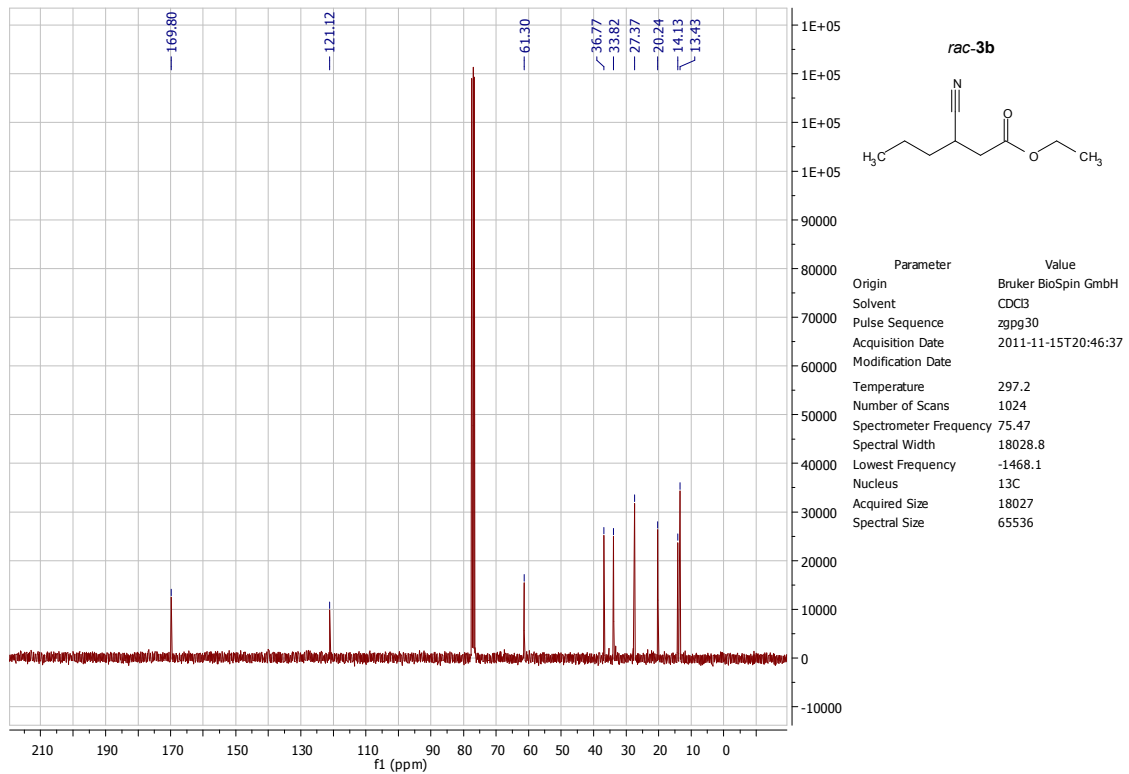



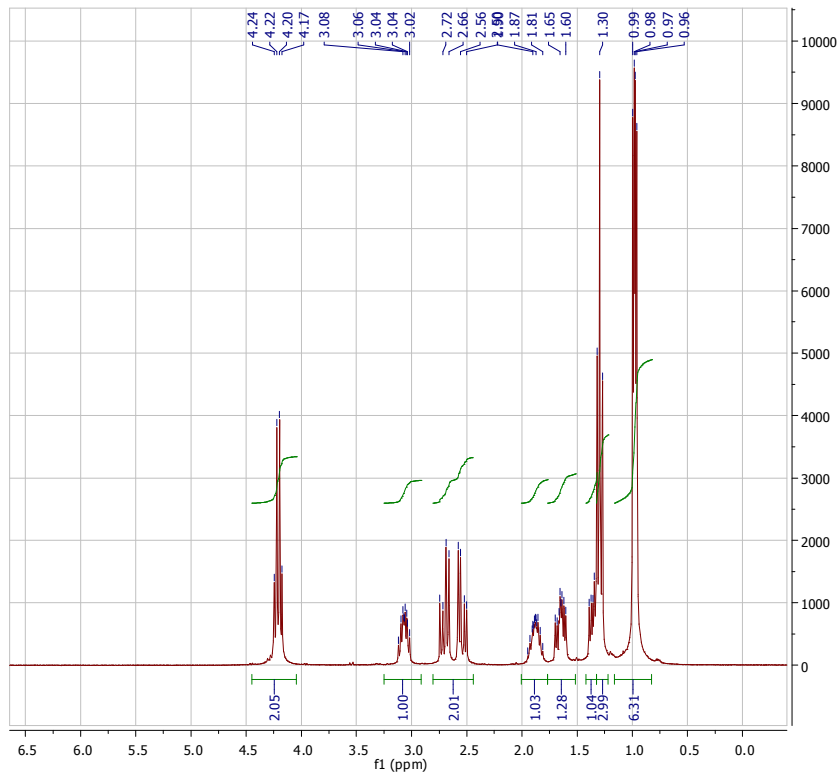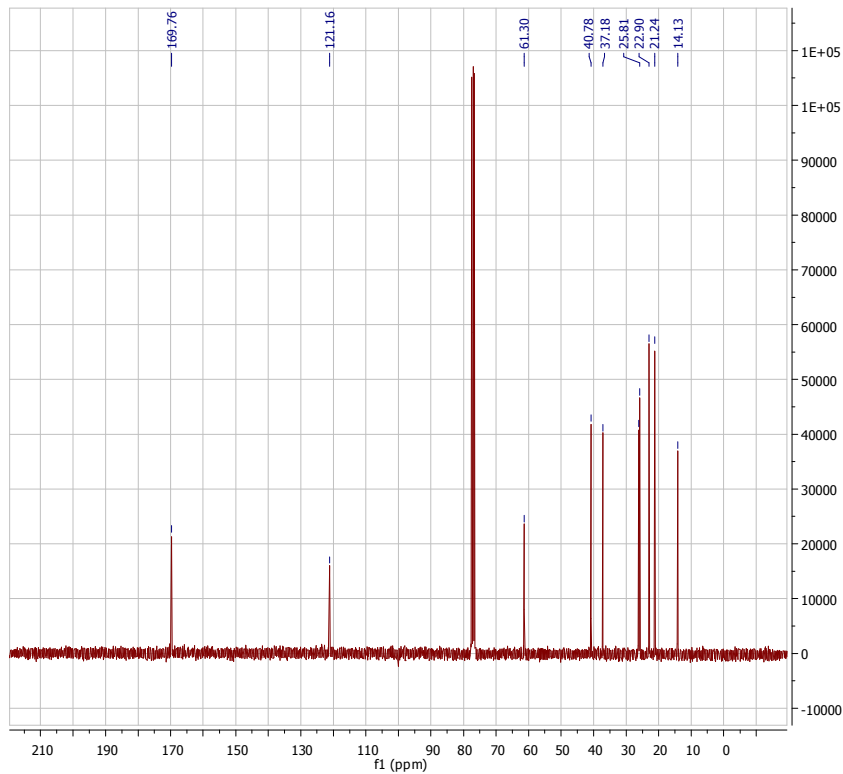

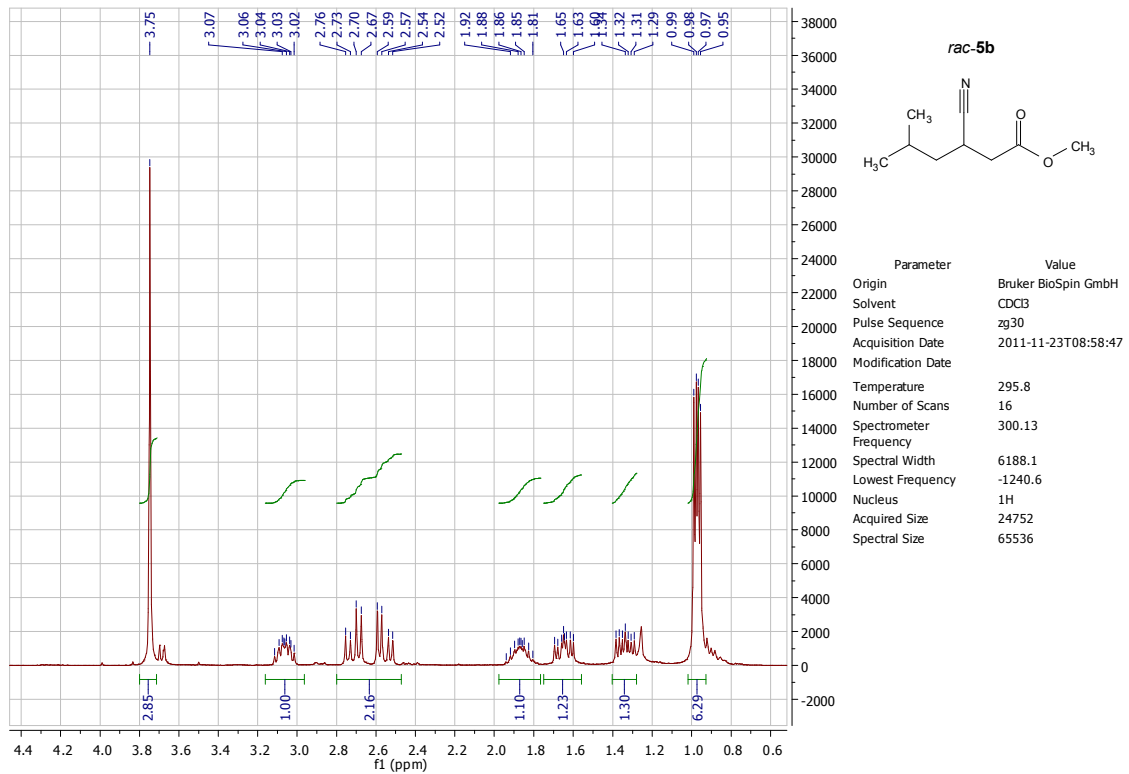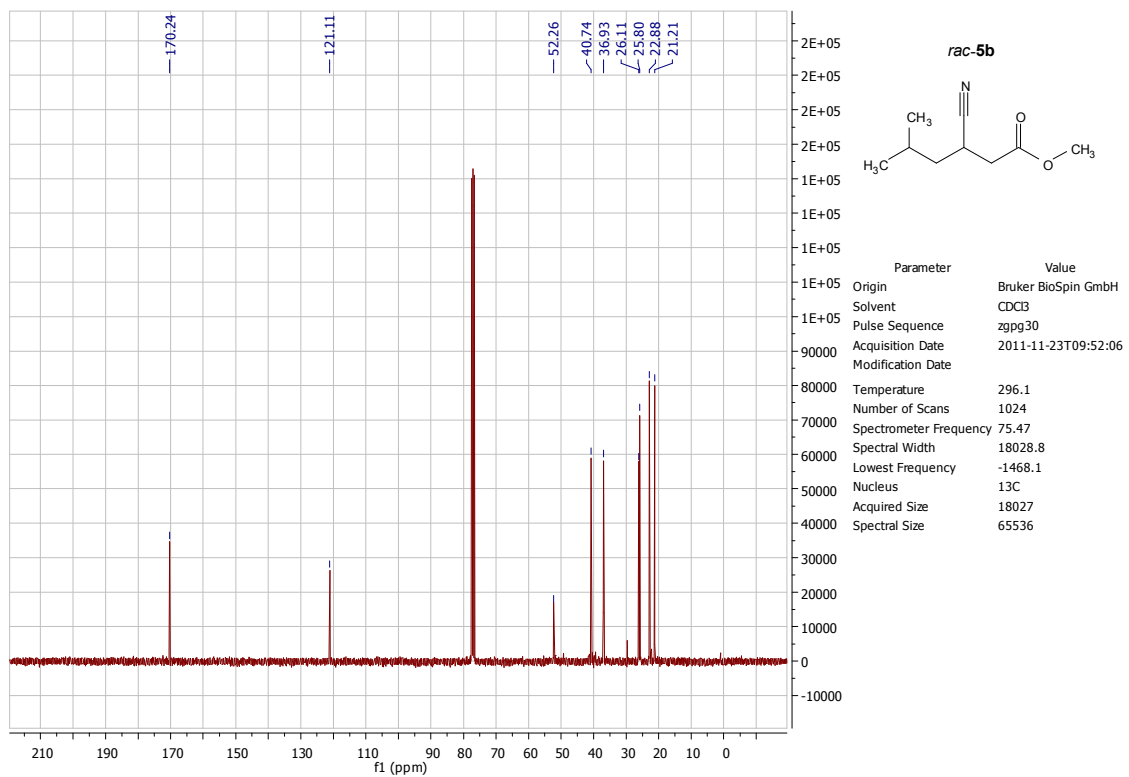

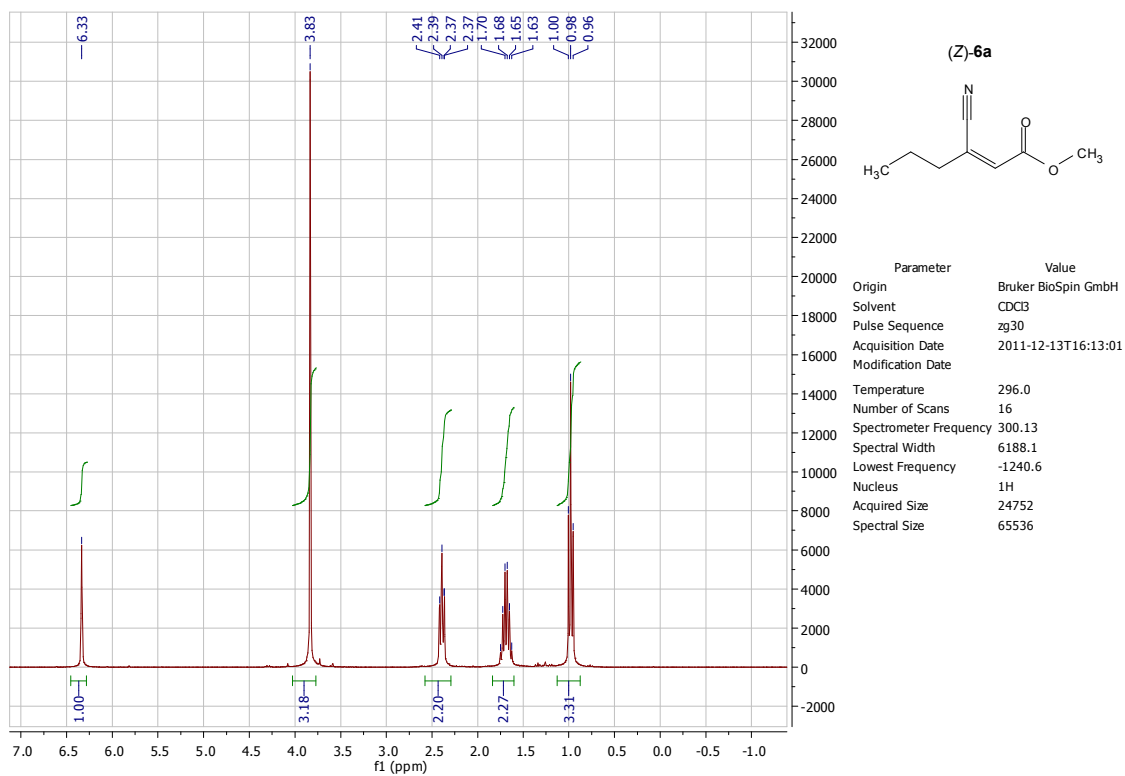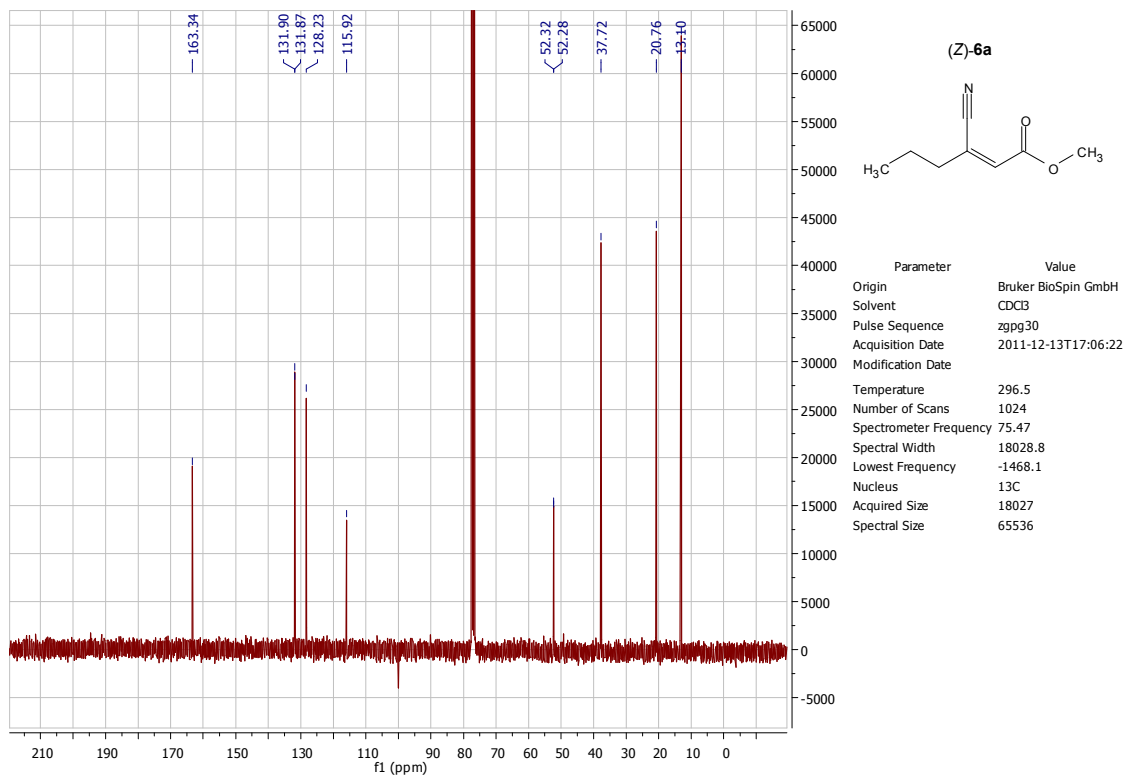

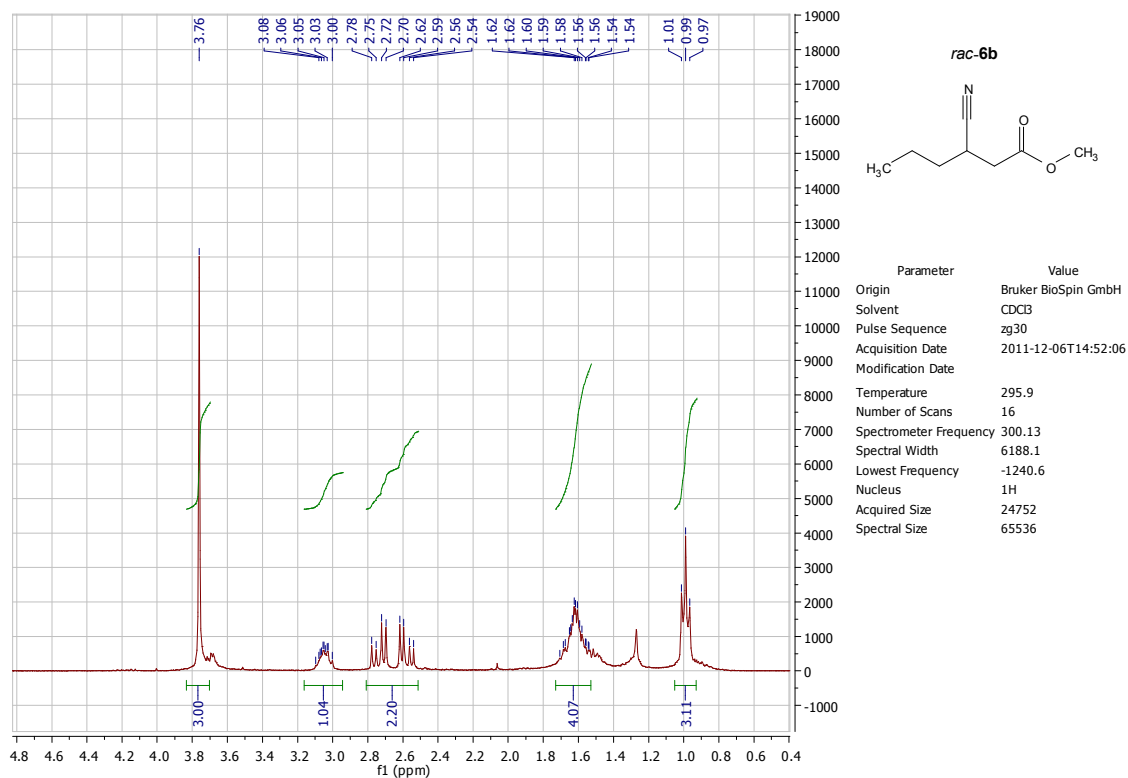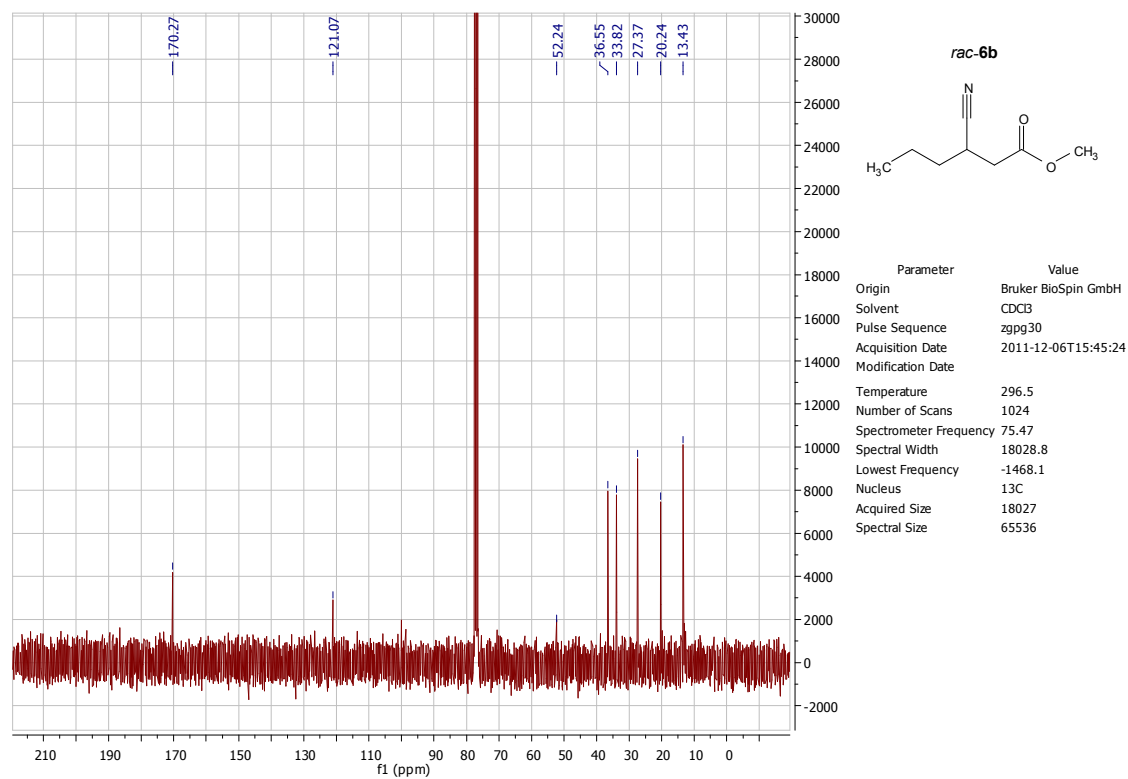

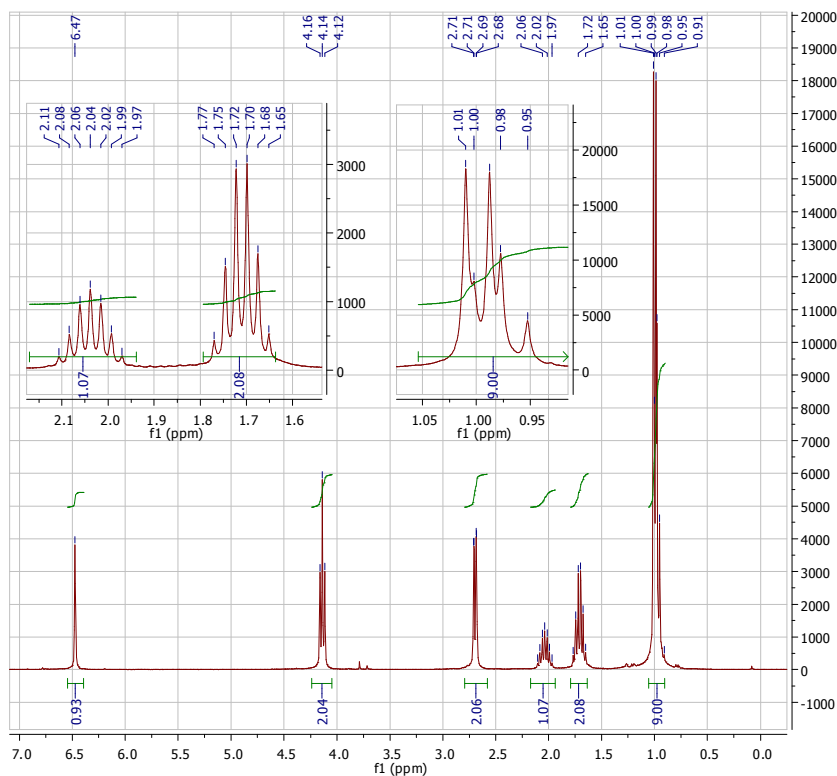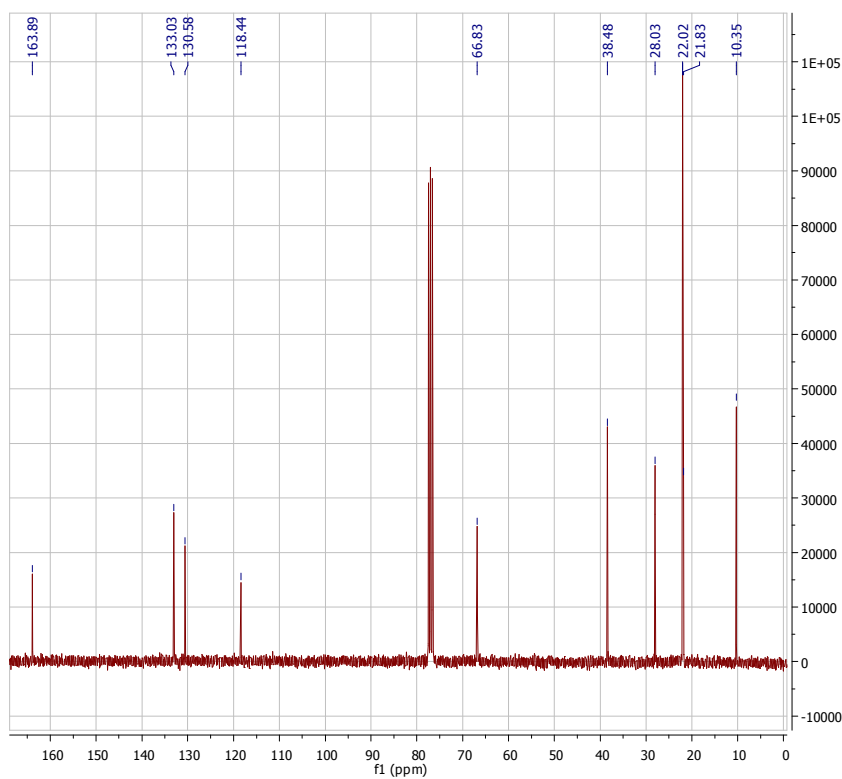

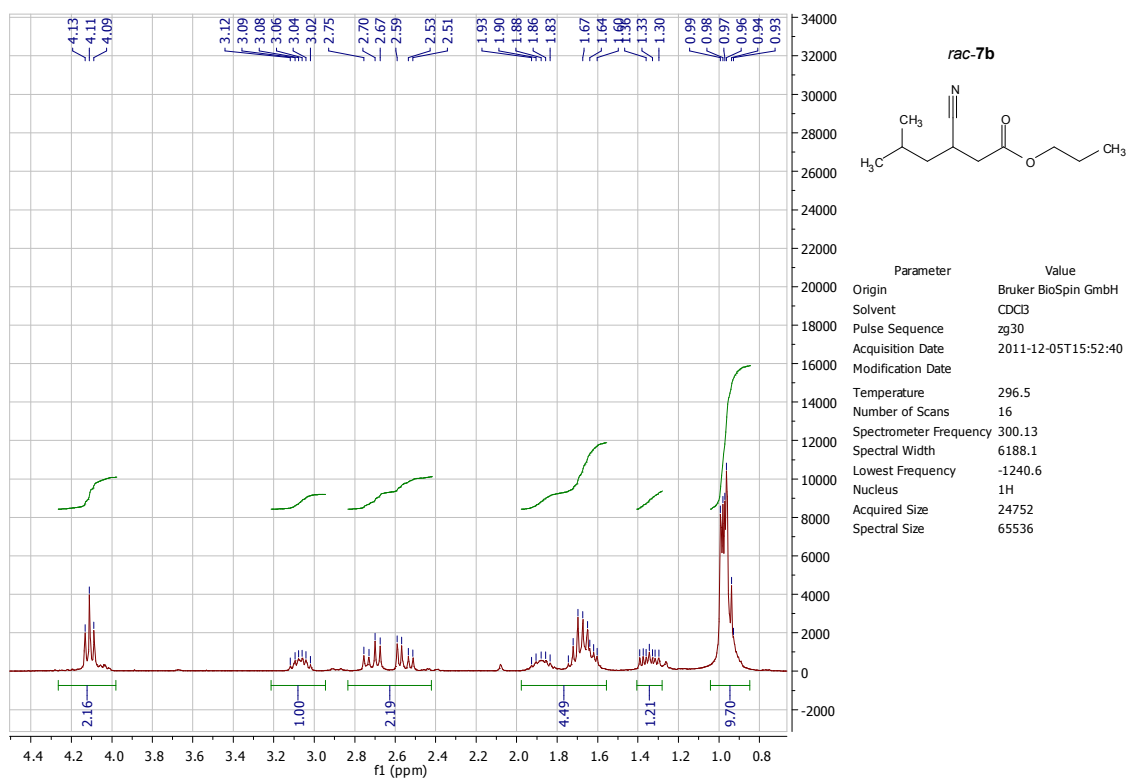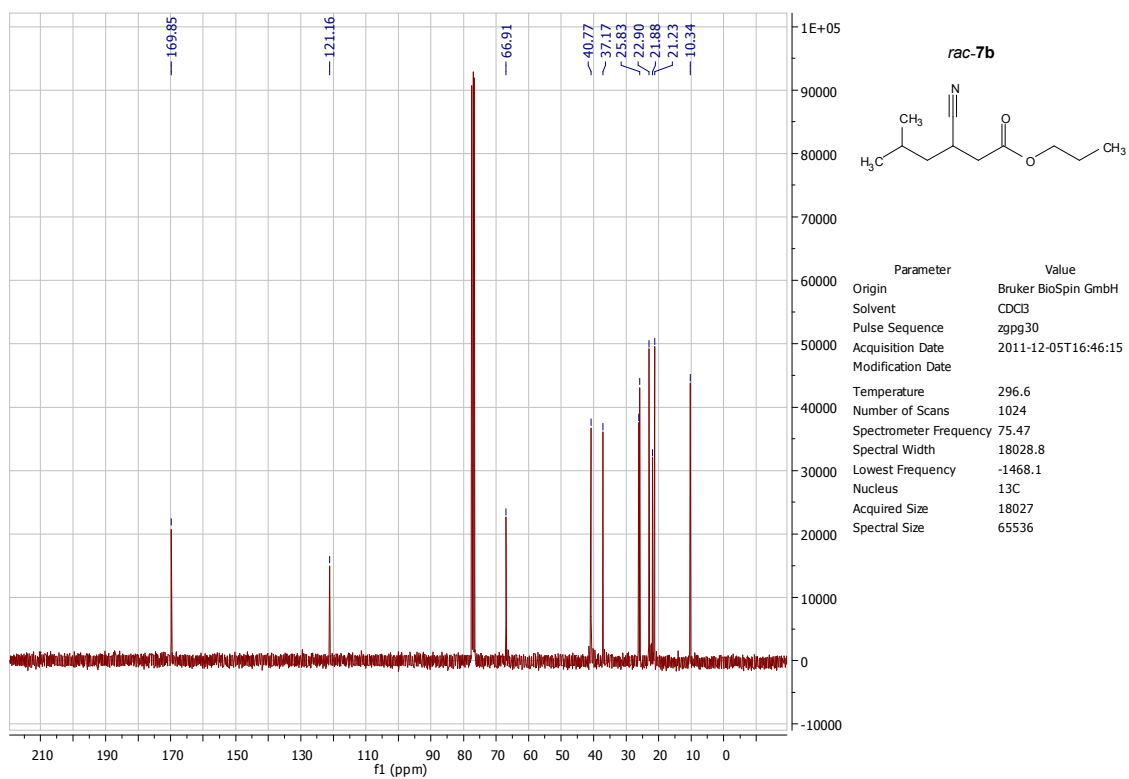

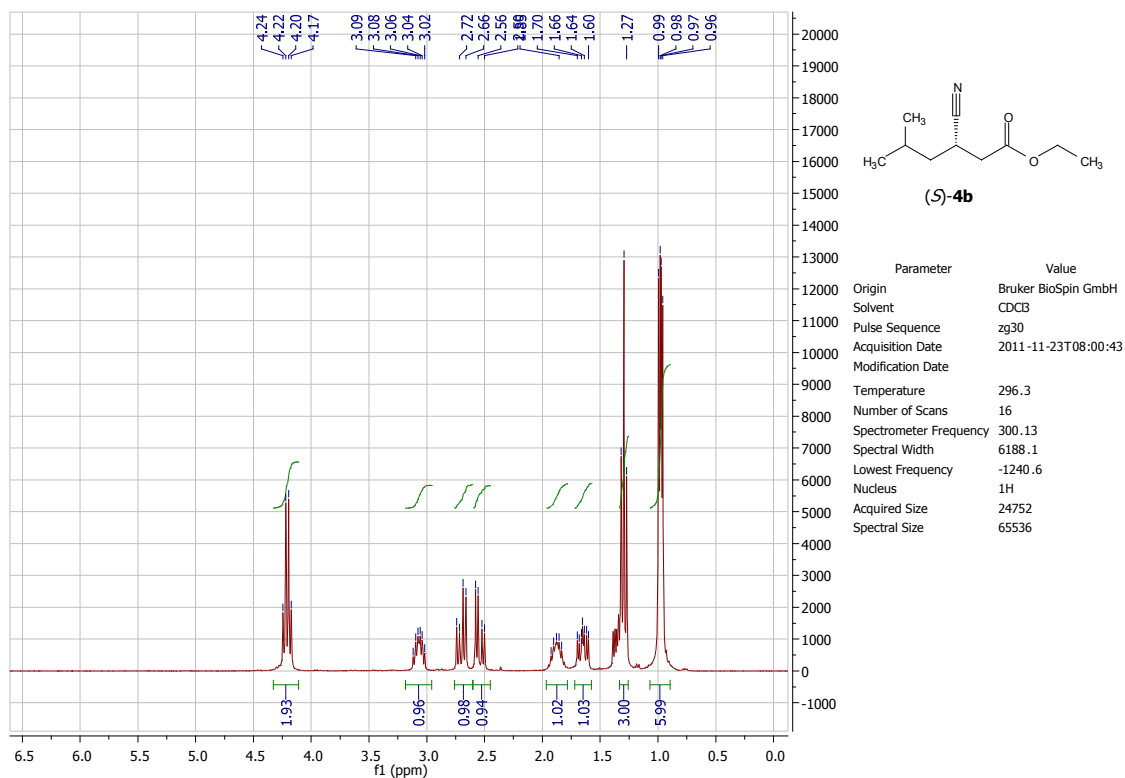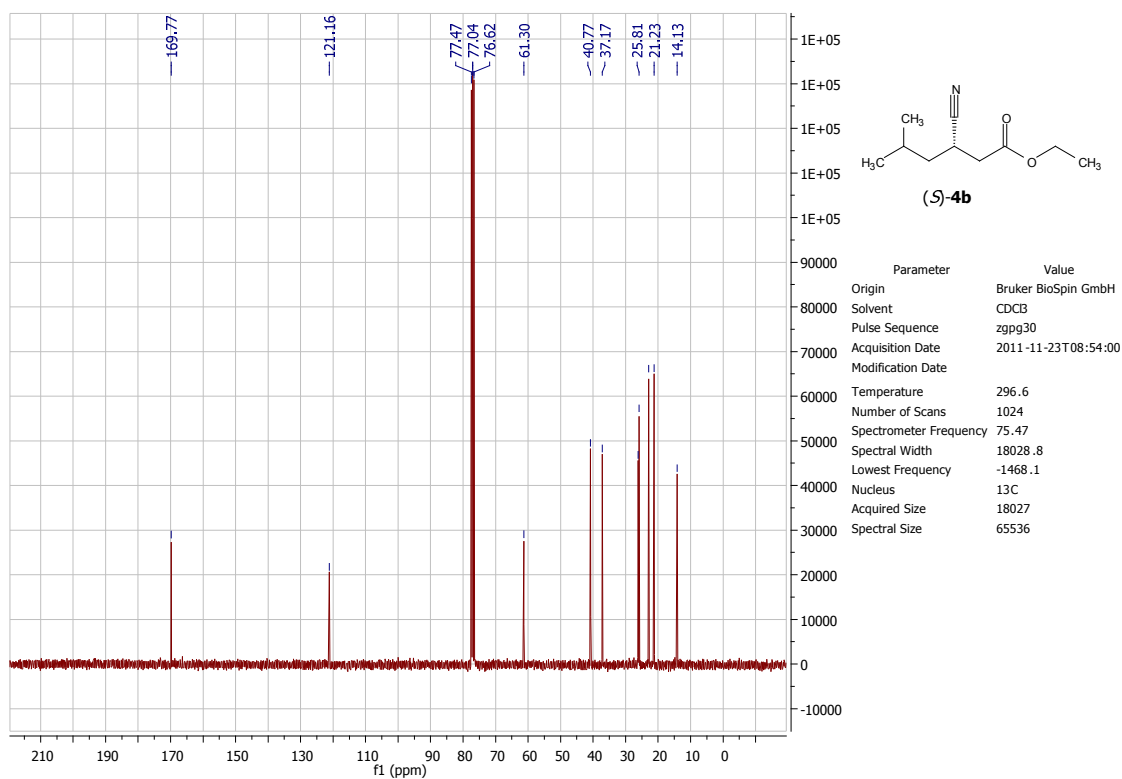

Supplement: jo302484p_si_001.pdf [file jo302484p_si_001.pdf]
